# Supplementary material for: Mitochondria-Targeted Delivery Strategy of Dual-Loaded Liposomes for Alzheimer’s Disease Therapy
Source: MDPI journal article supplement (doi:10.3390/ijms241310494), 2023-06-22
Supplement: s1 [file s1]

# Mitochondria-Targeted Delivery Strategy of Dual-Loaded Liposomes for Alzheimer's Disease Therapy

Leysan Vasileva<sup>1</sup>, Gulnara Gaynanova<sup>1</sup>, Farida Valeeva<sup>1</sup>, Grigory Belyaev<sup>1</sup>, Irina Zueva<sup>1</sup>, Kseniya Bushmeleva<sup>1</sup>, Guzel Sibgatullina<sup>2</sup>, Dmitry Samigullin<sup>2,3</sup>, Alexandra Vyshtakalyuk<sup>1</sup>, Konstantin Petrov<sup>1</sup>, Lucia Zakharova<sup>1</sup> and Oleg Sinyashin<sup>1,\*</sup>

<sup>1</sup> Arbuzov Institute of Organic and Physical Chemistry, FRC Kazan Scientific Center, Russian Academy of Sciences, 8 Arbuzov str., Kazan, 420088, Russia

<sup>2</sup> Kazan Institute of Biochemistry and Biophysics, FRC Kazan Scientific Center, Russian Academy of Sciences, 2/31 Lobachevsky str., Kazan, 420111, Russia

<sup>3</sup> Kazan National Research Technical University named after A.N. Tupolev - KAI, 10 K. Marx St., Kazan, 420111, Russia

\* Correspondence: oleg@iopc.ru

**Table S1.** Physicochemical parameters of liposomes modified with TPPB-14.  $D_h$  – hydrodynamic diameter, PDI – polydispersity index,  $\zeta$  – zeta potential, 4°C.

| Storage time | PC/Chol    |               |              | PC/Chol/TPPB-14 |               |              | PC/Chol/TOC |               |              | PC/Chol/TOC/TPPB-14 |               |              |
|--------------|------------|---------------|--------------|-----------------|---------------|--------------|-------------|---------------|--------------|---------------------|---------------|--------------|
|              | $D_h$ , nm | PDI           | $\zeta$ , mV | $D_h$ , nm      | PDI           | $\zeta$ , mV | $D_h$ , nm  | PDI           | $\zeta$ , mV | $D_h$ , nm          | PDI           | $\zeta$ , mV |
| <b>15 mM</b> |            |               |              |                 |               |              |             |               |              |                     |               |              |
| 1 day        | 107 ± 2    | 0.071 ± 0.027 | -9.2 ± 1.2   | 105 ± 2         | 0.109 ± 0.010 | 8.2 ± 1.3    | 105 ± 2     | 0.067 ± 0.012 | -1.8 ± 0.8   | 110 ± 3             | 0.133 ± 0.011 | 6.8 ± 0.4    |
| 1 week       | 116 ± 3    | 0.119 ± 0.001 | -12.3 ± 2.3  | 166 ± 2         | 0.234 ± 0.008 | 18.5 ± 1.9   | 130 ± 8     | 0.226 ± 0.015 | -7.1 ± 0.4   | 129 ± 3             | 0.209 ± 0.014 | 19.0 ± 2.6   |
| 2 months     | 112 ± 2    | 0.097 ± 0.012 | -10.4 ± 0.7  | 113 ± 3         | 0.123 ± 0.014 | 22.5 ± 1.5   | 111 ± 2     | 0.130 ± 0.012 | -23.1 ± 1.2  | 115 ± 3             | 0.140 ± 0.011 | 22.1 ± 3.6   |
| 4 months     | 114 ± 1    | 0.188 ± 0.009 | -10.3 ± 0.5  | 116 ± 1         | 0.124 ± 0.006 | 20.9 ± 1.3   | 113 ± 1     | 0.124 ± 0.024 | -13.2 ± 0.3  | 119 ± 1             | 0.122 ± 0.010 | 20.6 ± 0.5   |
| 5 months     | 116 ± 4    | 0.116 ± 0.005 | -10.6 ± 1.7  | 115 ± 3         | 0.114 ± 0.014 | 24.3 ± 1.9   | 114 ± 3     | 0.115 ± 0.004 | -17.0 ± 1.4  | 121 ± 2             | 0.101 ± 0.010 | 22.7 ± 3.4   |
| <b>20 mM</b> |            |               |              |                 |               |              |             |               |              |                     |               |              |
| 1 day        | 108 ± 2    | 0.078 ± 0.006 | -7.6 ± 0.5   | 110 ± 2         | 0.193 ± 0.010 | 14.3 ± 2.2   | 104 ± 3     | 0.071 ± 0.01  | -2.9 ± 1.4   | 113 ± 2             | 0.231 ± 0.015 | 11.0 ± 1.0   |
| 1 week       | 112 ± 1    | 0.079 ± 0.028 | -2.3 ± 0.5   | 118 ± 2         | 0.168 ± 0.00  | 24.8 ± 2.2   | 114 ± 1     | 0.154 ± 0.016 | -1.9 ± 0.5   | 114 ± 1             | 0.119 ± 0.018 | 32.3 ± 0.1   |
| 2 months     | 127 ± 2    | 0.198 ± 0.017 | -3.9 ± 0.2   | 129 ± 5         | 0.202 ± 0.024 | 40.5 ± 4.3   | 108 ± 2     | 0.074 ± 0.015 | -8.4 ± 1.2   | 119 ± 4             | 0.155 ± 0.025 | 34.8 ± 1.5   |
| 4 months     | 112 ± 1    | 0.092 ± 0.017 | -6.4 ± 1.9   | 114 ± 1         | 0.150 ± 0.003 | 35.9 ± 1.4   | 113 ± 1     | 0.088 ± 0.018 | -11.2 ± 3.3  | 130 ± 2             | 0.186 ± 0.005 | 27.0 ± 1.0   |
| 5 months     | 116 ± 2    | 0.085 ± 0.008 | -1.6 ± 0.5   | 115 ± 1         | 0.114 ± 0.013 | 36.6 ± 0.5   | 116 ± 2     | 0.101 ± 0.005 | -7.9 ± 1.4   | 122 ± 1             | 0.105 ± 0.008 | 30.5 ± 0.3   |
| <b>30 mM</b> |            |               |              |                 |               |              |             |               |              |                     |               |              |
| 1 day        | 115 ± 2    | 0.067 ± 0.015 | -4.9 ± 0.5   | 115 ± 2         | 0.120 ± 0.01  | 23.9 ± 3.4   | 103 ± 2     | 0.077 ± 0.005 | -3.6 ± 0.7   | 110 ± 1             | 0.148 ± 0.017 | 11.3 ± 2.8   |
| 1 week       | 115 ± 1    | 0.058 ± 0.039 | -5.5 ± 1.7   | 116 ± 1         | 0.103 ± 0.011 | 25.5 ± 1.8   | 105 ± 2     | 0.071 ± 0.017 | -5.8 ± 0.4   | 112 ± 2             | 0.141 ± 0.060 | 23.5 ± 2.1   |
| 2 months     | 124 ± 1    | 0.127 ± 0.020 | -6.9 ± 1.2   | 120 ± 4         | 0.140 ± 0.023 | 41.1 ± 3.3   | 111 ± 4     | 0.138 ± 0.024 | -7.2 ± 1.2   | 112 ± 2             | 0.125 ± 0.018 | 31.9 ± 2.2   |
| 4 months     | 121 ± 1    | 0.104 ± 0.023 | -14.4 ± 8.3  | 123 ± 2         | 0.121 ± 0.019 | 35.3 ± 0.9   | 126 ± 3     | 0.154 ± 0.023 | -7.2 ± 0.5   | 117 ± 1             | 0.121 ± 0.013 | 26.3 ± 2.9   |
| 5 months     | 121 ± 1    | 0.083 ± 0.012 | -5.0 ± 0.9   | 126 ± 1         | 0.142 ± 0.029 | 35.1 ± 1.4   | 158 ± 1     | 0.147 ± 0.016 | -4.0 ± 0.2   | 120 ± 1             | 0.103 ± 0.021 | 27.3 ± 0.9   |

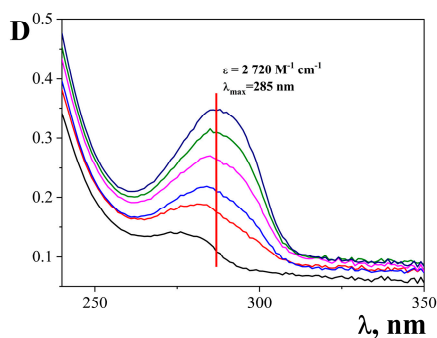

(a)

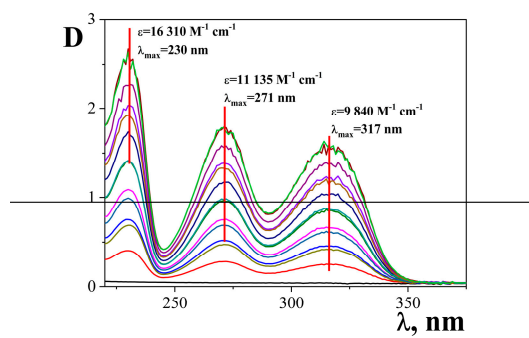

(b)

**Figure S1.** Absorption spectra and extinction coefficient of (a)  $\alpha$ -tocopherol (in ethanol) and (b) donepezil hydrochloride (in Milli-Q water); cuvette thickness = 1 cm.

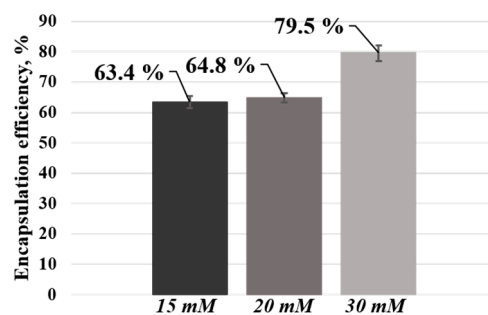

**Figure S2.** Encapsulation efficiency of PC/Chol/TPPB-14 liposomes toward donepezil hydrochloride.

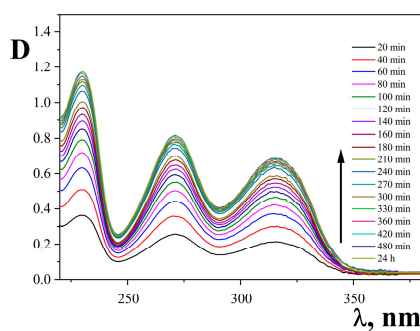

**(a)**

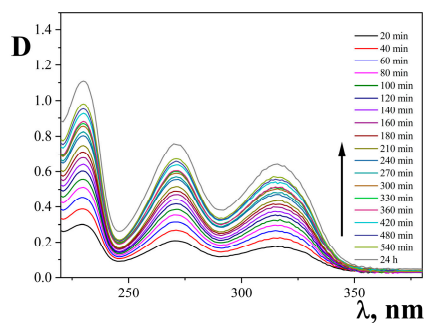

**(b)**

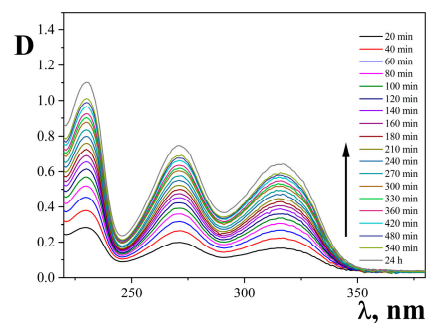

**(c)**

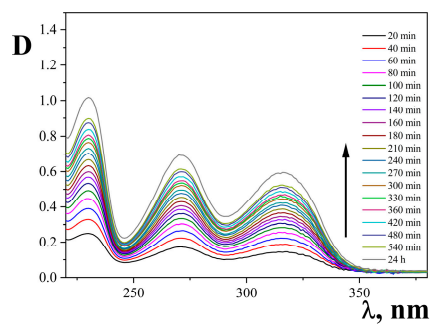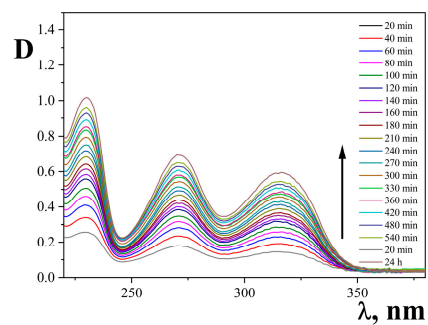

(d)

(e)

**Figure S3.** The absorption spectra of DNP at different time intervals of release for: (a) free DNP; (b) PC/Chol/DNP; (c) PC/Chol/TPPB-14/DNP; (d) PC/Chol/TOC/DNP; (e) PC/Chol/TOC/TPPB-14/DNP. Total lipid concentration is 20 mM. Phosphate buffer (0.025 M), pH = 7.4, 37°C; cuvette thickness = 1 cm; the arrow indicates the direction of dialysis duration increasing.

**Table S2.** The release kinetic model fitting parameters of DNP\*.

| System                | Model            |                                  |                |                  |                |                                 |                |                  |                |
|-----------------------|------------------|----------------------------------|----------------|------------------|----------------|---------------------------------|----------------|------------------|----------------|
|                       | Korsmeyer-Peppas |                                  |                | First-Order      |                | Higuchi                         |                | Zero-Order       |                |
|                       | n                | $k_{KP}$ ,<br>%/min <sup>n</sup> | R <sup>2</sup> | $k_1$ ,<br>1/min | R <sup>2</sup> | $k_H$ ,<br>%/min <sup>1/2</sup> | R <sup>2</sup> | $k_0$ ,<br>%/min | R <sup>2</sup> |
| DNP                   | 0.392            | 10.234                           | 0.9940         | 0.010            | 0.9533         | 5.929                           | 0.9691         | 0.428            | 0.4570         |
| PC/Chol**             | 0.403            | 7.977                            | 0.9993         | 0.007            | 0.8775         | 4.881                           | 0.9801         | 0.354            | 0.5065         |
| PC/Chol/TPPB-14**     | 0.408            | 7.915                            | 0.9999         | 0.007            | 0.8973         | 4.965                           | 0.9815         | 0.360            | 0.5127         |
| PC/Chol/TOC**         | 0.415            | 7.123                            | 0.9992         | 0.006            | 0.8778         | 4.630                           | 0.9848         | 0.336            | 0.5358         |
| PC/Chol/TOC/TPPB-14** | 0.417            | 6.539                            | 0.9991         | –                | –              | 4.299                           | 0.9855         | 0.312            | 0.5405         |

\* Data obtained for the initial part of the DNP release curves, i.e., from 0 min to 270 min.

\*\* Total lipid concentration is 20 mM.

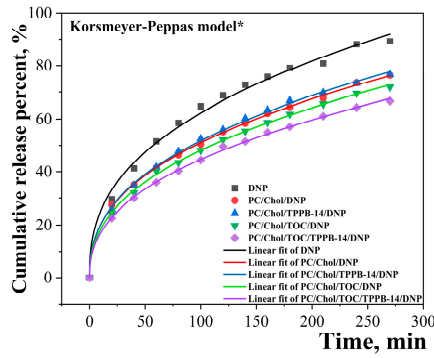

(a)

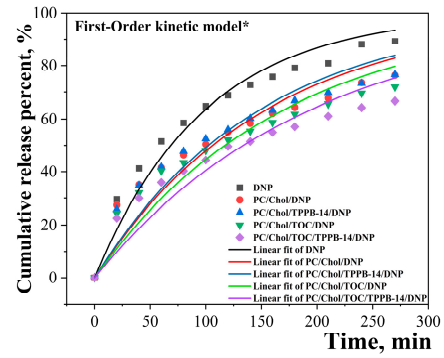

(b)

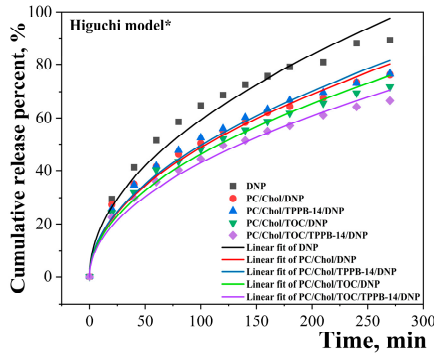

(c)

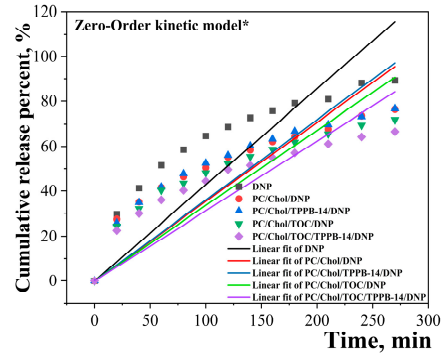

(d)

**Figure S4.** The release kinetic model fitting curves of DNP: (a) Korsmeyer–Peppas model; (b) First-Order kinetic model; (c) Higuchi model; (d) Zero-Order kinetic model. Total lipid concentration is 20 mM. Phosphate buffer (0.025 M), pH = 7.4, 37°C. \* Data obtained for the initial part of the DNP release curves, i.e., from 0 min to 270 min.

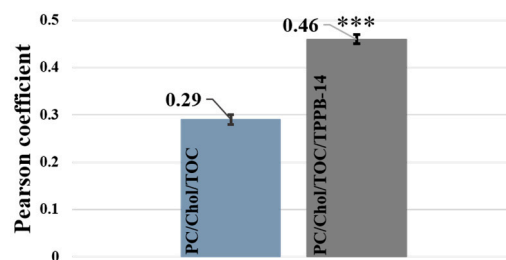

**Figure S5.** Pearson's Correlation Coefficient for modified and unmodified liposomes. Data are presented as means  $\pm$  SD. \*\*\* — difference with unmodified liposomes is statistically significant at  $p \leq 0.001$ . Statistical analysis was performed using the One-Way ANOVA test.

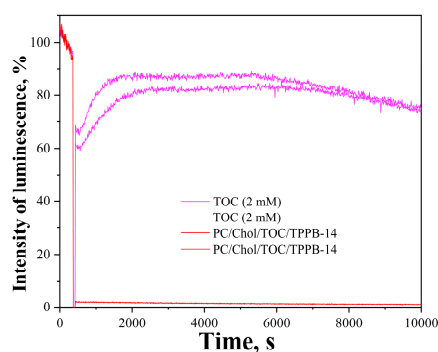

**Figure S6.** Dependences of chemiluminescence intensity on time. The experiment was carried out twice for each sample.

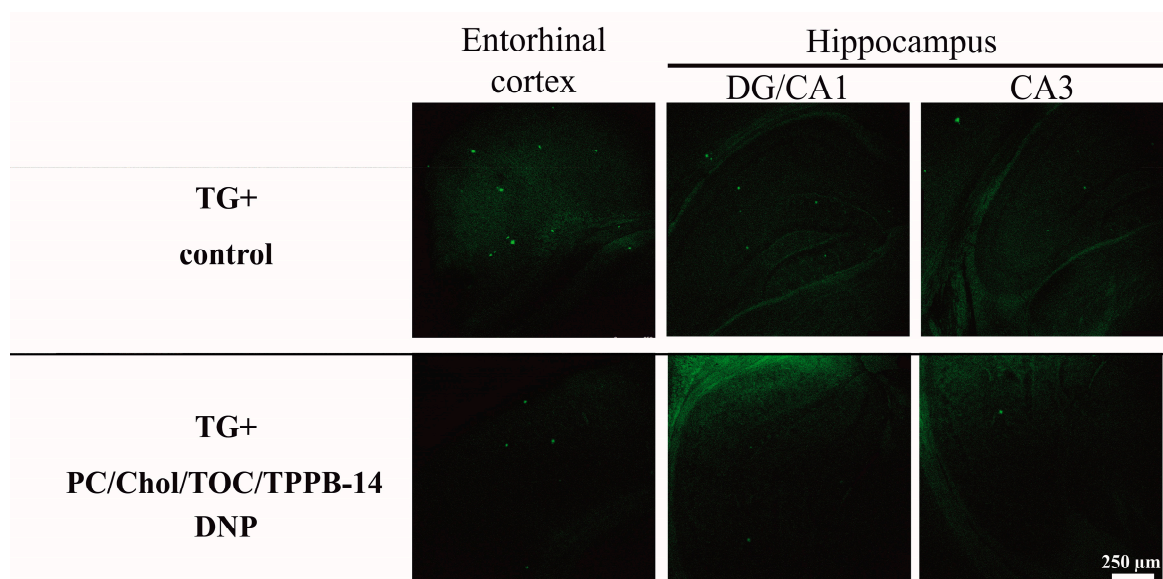

**Figure S7.** Visualization of A $\beta$  plaques in the entorhinal cortex and areas of hippocampus of control group of transgenic (TG+) mice and group of transgenic (TG+) mice treated with PC/Chol/TOC/TPPB-14/DNP liposomes. Scale bar 250  $\mu$ m.
